# Supplementary material for: Toward Clean and Economic Production of Highly Efficient Perovskite Solar Module Using a Cost-Effective and Low Toxic Aqueous Lead-Nitrate Precursor
Source: MDPI journal article supplement (doi:10.3390/nano12213783), 2022-10-27
Supplement: s1 [file s1]

## Supporting Information

# Toward Clean and Economic Production of Highly Efficient Perovskite Solar Module Using a Cost-Effective and Low Toxic Aqueous Lead-Nitrate Precursor

Yi-Chen Teng <sup>1</sup>, Tzu-Sen Su <sup>1,\*</sup>, Shiang Lan <sup>2</sup>, Ahmed Fouad Musa <sup>1</sup> and Tzu-Chien Wei <sup>1,\*</sup>

<sup>1</sup> Department of Chemical Engineering, National Tsing Hua University, 101, Section 2, Kuang Fu Road, Hsinchu 30013, Taiwan

<sup>2</sup> Taiwan Perovskite Technology Co., Ltd., 2F, No. 33, Section 1, Jiafeng 11th Road, Zhubei City 302052, Taiwan

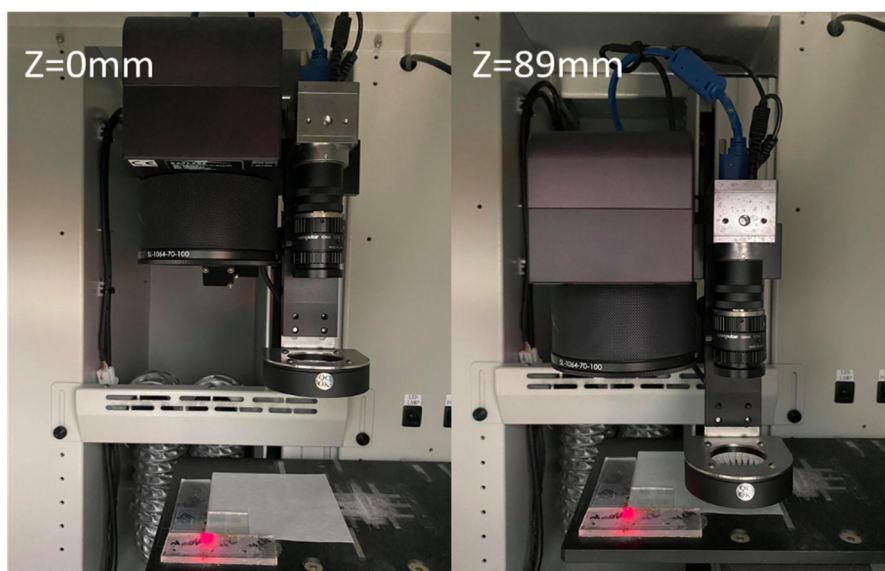

**Figure S1.** The control of focal length at Z axis.

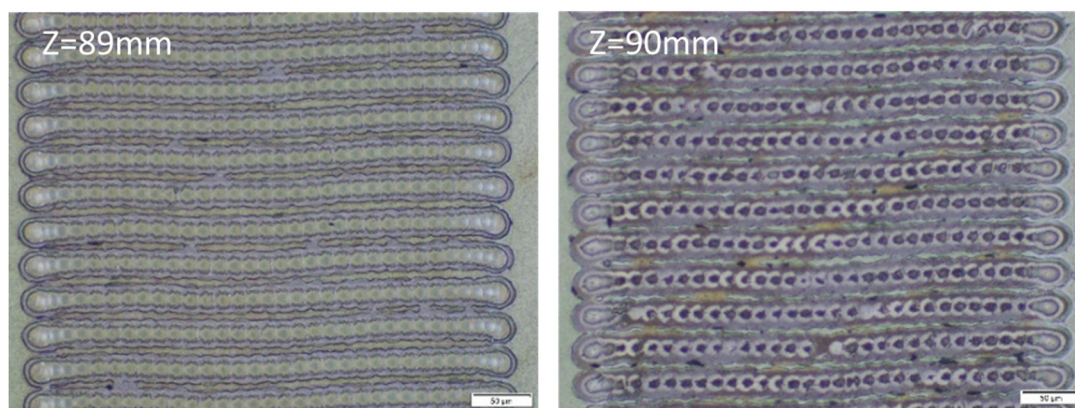

**Figure S2.** The optical microscopy images of 89 and 90mm focal length of P2 scribing on FTO/c-TiO<sub>2</sub>/m-TiO<sub>2</sub>/Perovskite/HTM

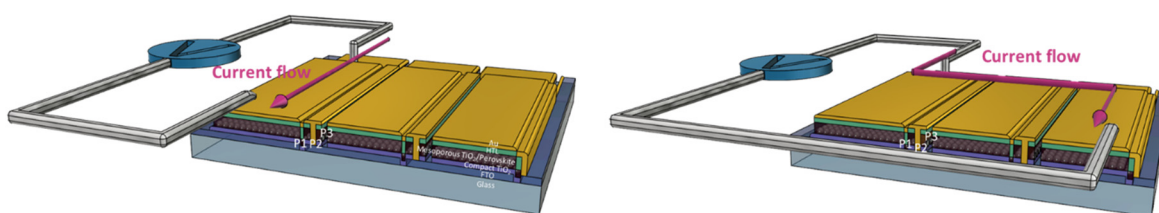

**Figure S3.** The pathway of current in the single cell and three interconnected cells.

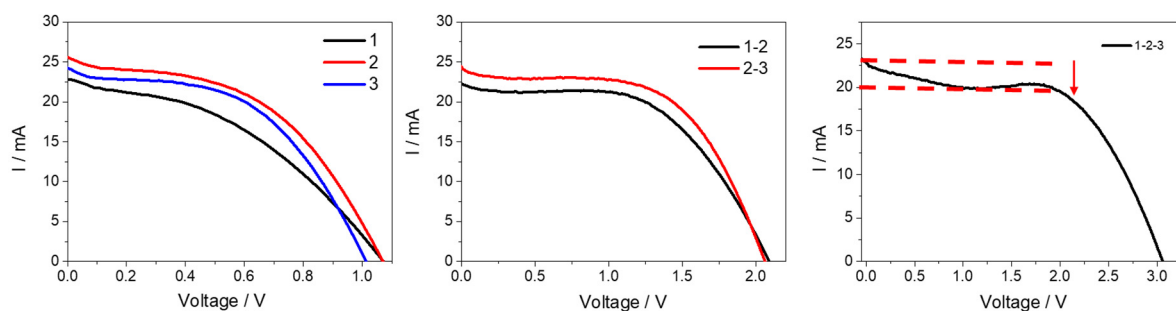

**Figure S4.** The IV curves of single cell and interconnected cell.

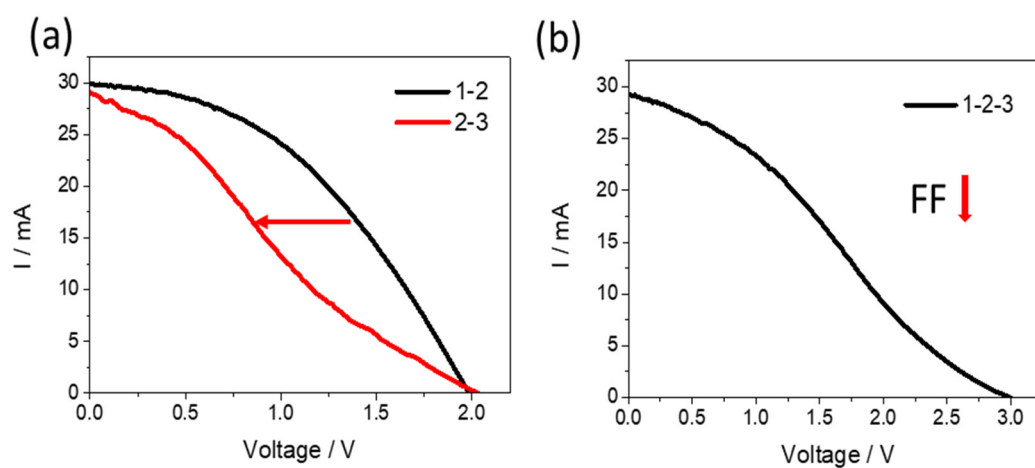

**Figure S5.** The IV curves of single cell and interconnected cell.

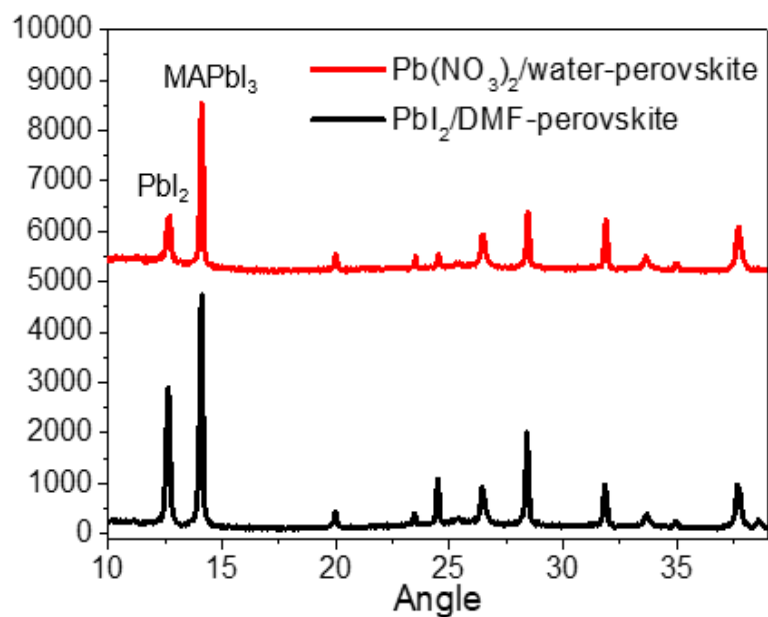

**Figure S6.** X-ray diffraction (XRD) pattern of perovskite films made by  $\text{PbI}_2/\text{DMF}$  and  $\text{Pb}(\text{NO}_3)_2/\text{water}$  two-step dipping procedure.

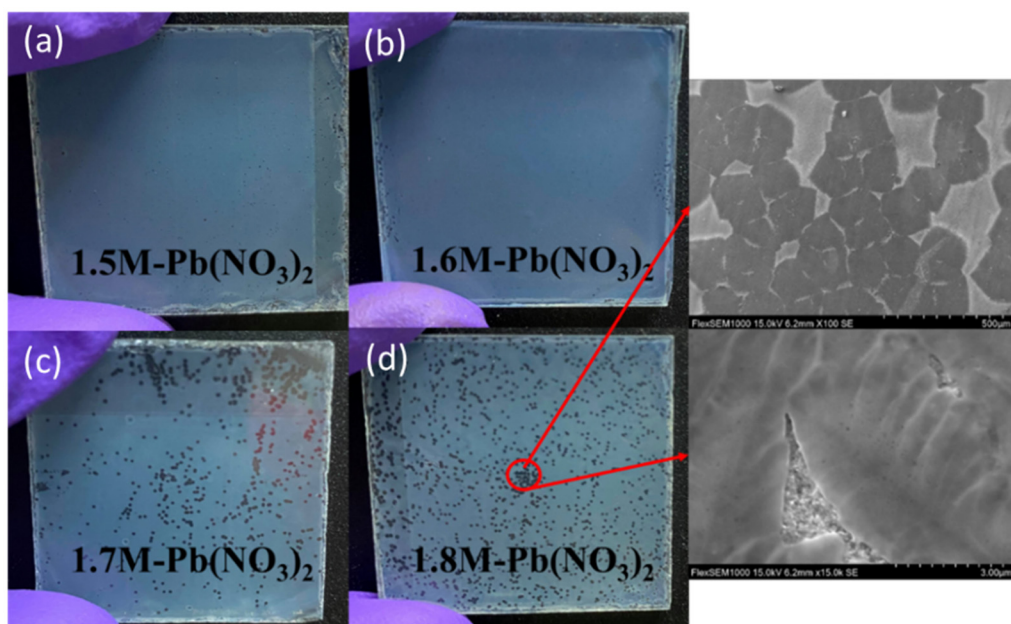

**Figure S7.** The photograph of  $\text{Pb}(\text{NO}_3)_2$  films made by (a) 1.5M (b) 1.6M (c) 1.7M and (d) 1.8M  $\text{Pb}(\text{NO}_3)_2/\text{water}$  two-step dipping procedure, and corresponding SEM images of defect on 1.8M  $\text{Pb}(\text{NO}_3)_2$  films.

**Table S1.** Cost analysis of materials for PbI<sub>2</sub>/DMF and Pb(NO<sub>3</sub>)<sub>2</sub>/water two-step dipping procedure under academic research.

|                                   |         | PbI <sub>2</sub> /DMF protocol |        |         | Pb(NO <sub>3</sub> ) <sub>2</sub> /water protocol |        |        |
|-----------------------------------|---------|--------------------------------|--------|---------|---------------------------------------------------|--------|--------|
| Chemical                          | Purity  | Price                          | Amount | Cost    | Price                                             | Amount | Cost   |
| 1                                 |         |                                |        |         |                                                   |        |        |
| PbI <sub>2</sub>                  | 99.999% | 25.8 USD/g                     | 0.17 g | 4.46 \$ | -                                                 | -      | -      |
| Pb(NO <sub>3</sub> ) <sub>2</sub> | 99.999% | -                              | -      | -       | 5.99 \$/g                                         | 0.13 g | 0.64\$ |
| 2                                 |         |                                |        |         |                                                   |        |        |
| DMF                               | ≥99.9%  | 0.15 USD/mL                    | 0.23mL | 0.03\$  | -                                                 | -      | -      |
| DMSO                              | ≥99.9%  | 0.32 USD/mL                    | 0.03mL | 0.01\$  | -                                                 | -      | -      |
| DI water                          | -       | -                              | -      | -       | ~0 \$/mL                                          | 0.25mL | ~0 \$  |
| Efficiency of PSM                 |         | PCE=10.75 %                    |        |         | PCE=13.10 %                                       |        |        |
| Total cost per W                  |         | <b>99.74 \$/W</b>              |        |         | <b>14.42 \$/W</b>                                 |        |        |

Note: (a) Active area = 4.2 cm<sup>2</sup>; (b) The price of material and solvent are taken from Sigma-Aldrich (USA) website. (c) The high quality and amount of materials are selected by the academic research of requirement.

**Table S2.** Cost analysis of materials for PbI<sub>2</sub>/DMF and Pb(NO<sub>3</sub>)<sub>2</sub>/water two-step dipping procedure under industrial production.

|                                   |        | PbI <sub>2</sub> /DMF procedure |        |         | Pb(NO <sub>3</sub> ) <sub>2</sub> /water procedure |        |        |
|-----------------------------------|--------|---------------------------------|--------|---------|----------------------------------------------------|--------|--------|
| Materials                         | Purity | Price                           | Amount | Cost    | Price                                              | Amount | Cost   |
| PbI <sub>2</sub>                  | 99%    | 1.04\$/g                        | 0.17 g | 0.18 \$ | -                                                  | -      | -      |
| Pb(NO <sub>3</sub> ) <sub>2</sub> | 99%    | -                               | -      | -       | 0.44 \$/g                                          | 0.13 g | 0.06\$ |
| DMF                               | 99.8%  | 0.06\$/mL                       | 0.23mL | 0.01\$  | -                                                  | -      | -      |
| DMSO                              | 99.9%  | 0.18\$/mL                       | 0.03mL | 0.01\$  | -                                                  | -      | -      |
| DI water                          | -      | -                               | -      | -       | ~0 \$/mL                                           | 0.25mL | ~0 \$  |
| Efficiency of PSM                 |        | PCE=15.00%                      |        |         | PCE=15.00%                                         |        |        |
| Total cost per W                  |        | <b>3.14 \$/W</b>                |        |         | <b>0.92 \$/W</b>                                   |        |        |

Note: (a) Active area = 4.2 cm<sup>2</sup>; (b) The price of material and solvent are taken from Sigma-Aldrich (USA) website. (c) The quality and amount of materials are selected by the industrial production of requirement.

**Table S3.** Cost analysis of materials for PbI<sub>2</sub>/DMF and Pb(NO<sub>3</sub>)<sub>2</sub>/water two-step dipping

procedure under industrial production.

|                                   |        | PbI <sub>2</sub> /DMF procedure |        |         | Pb(NO <sub>3</sub> ) <sub>2</sub> /water procedure |        |        |
|-----------------------------------|--------|---------------------------------|--------|---------|----------------------------------------------------|--------|--------|
| Materials                         | Purity | Price                           | Amount | Cost    | Price                                              | Amount | Cost   |
| PbI <sub>2</sub>                  | 99%    | 1.04\$/g                        | 0.17 g | 0.18 \$ | -                                                  | -      | -      |
| Pb(NO <sub>3</sub> ) <sub>2</sub> | 99%    | -                               | -      | -       | 0.44 \$/g                                          | 0.13 g | 0.06\$ |
| DMF                               | 99.8%  | 0.06\$/mL                       | 0.23mL | 0.01\$  | -                                                  | -      | -      |
| DMSO                              | 99.9%  | 0.18\$/mL                       | 0.03mL | 0.01\$  | -                                                  | -      | -      |
| DI water                          | -      | -                               | -      | -       | ~0 \$/mL                                           | 0.25mL | ~0 \$  |
| Efficiency of PSM                 |        | PCE=20.00%                      |        |         | PCE=15.00%                                         |        |        |
| Total cost per W                  |        | <b>2.36 \$/W</b>                |        |         | <b>0.92 \$/W</b>                                   |        |        |

Note: (a) Active area = 4.2 cm<sup>2</sup>; (b) The price of material and solvent are taken from Sigma-Aldrich (USA) website. (c) The quality and amount of materials are selected by the industrial production of requirement.
